# Supplementary material for: HMGCS2 Mediates Ketone Production and Regulates the Proliferation and Metastasis of Hepatocellular Carcinoma
Source: PubMed Central journal article supplement (PMC6966636; doi:10.3390/cancers11121876), 2019-11-26
Supplement: cancers-11-01876-s001.pdf [file cancers-11-01876-s001.pdf]

Article

# HMGC2 Mediates Ketone Production and Regulates the Proliferation and Metastasis of Hepatocellular Carcinoma

Yuan-Hsi Wang <sup>1,2</sup>, Chao-Lien Liu <sup>1</sup>, Wan-Chun Chiu <sup>3,4</sup>, Yuh-Ching Twu <sup>2</sup>, and Yi-Jen Liao <sup>1,\*</sup>

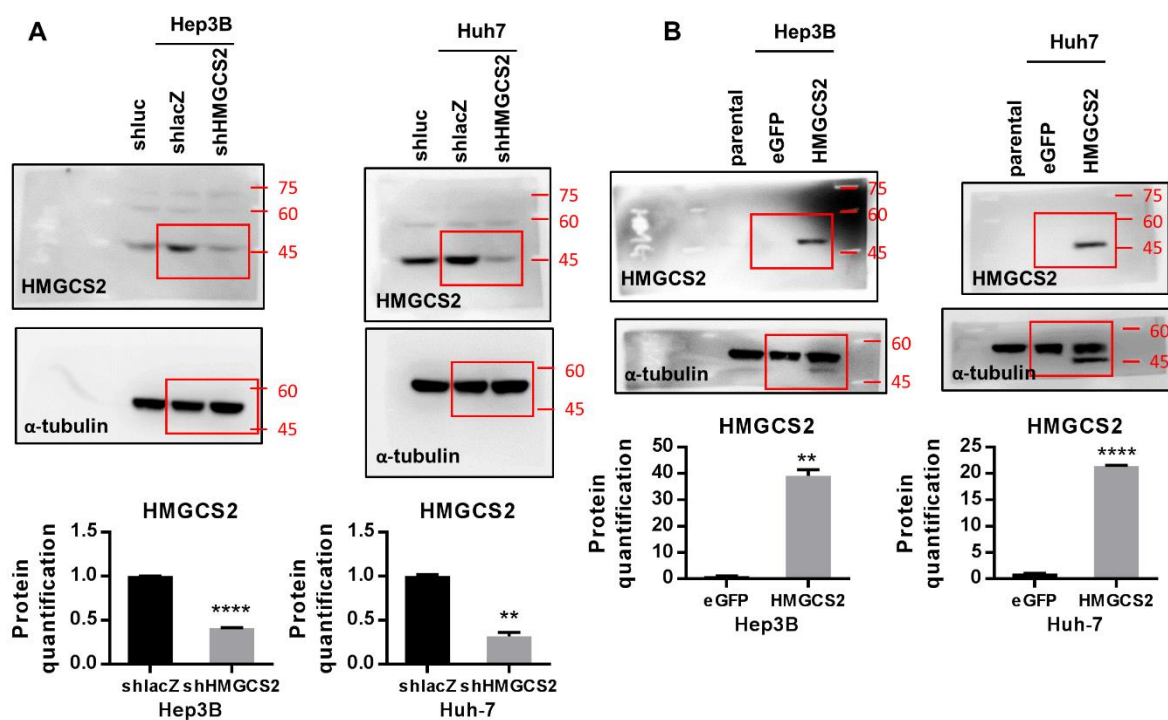

**Figure S1.** Original unedited pictures and protein quantification of Figure 2. Complete western blot image corresponding to Figure 2 showing all bands and molecular weight markers for HMGC2 and  $\alpha$ -tubulin. The quantification of the figure was presented by using ImageJ system. \*\*  $p < 0.01$ ; \*\*\*\*  $p < 0.0001$  vs. control group.

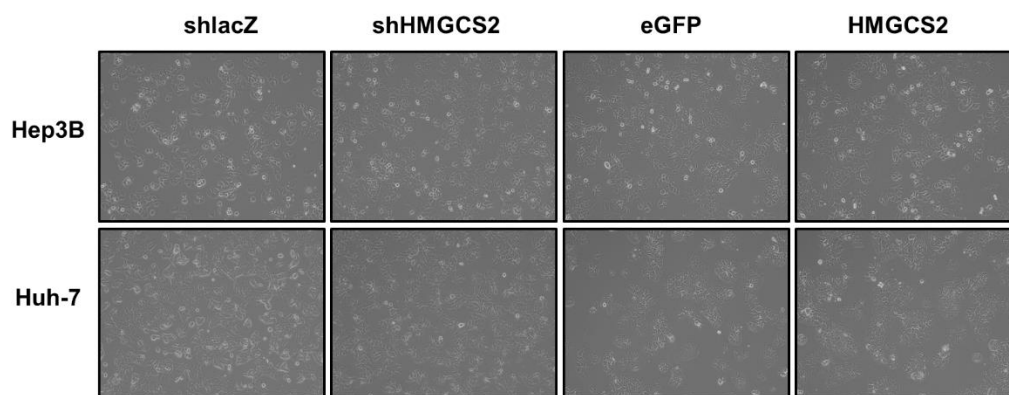

**Figure S2.** Investigation of cell morphology by light microscopy. Optical microscopy images in different HMGC2 gene modified Hep3B and Huh-7 cells.

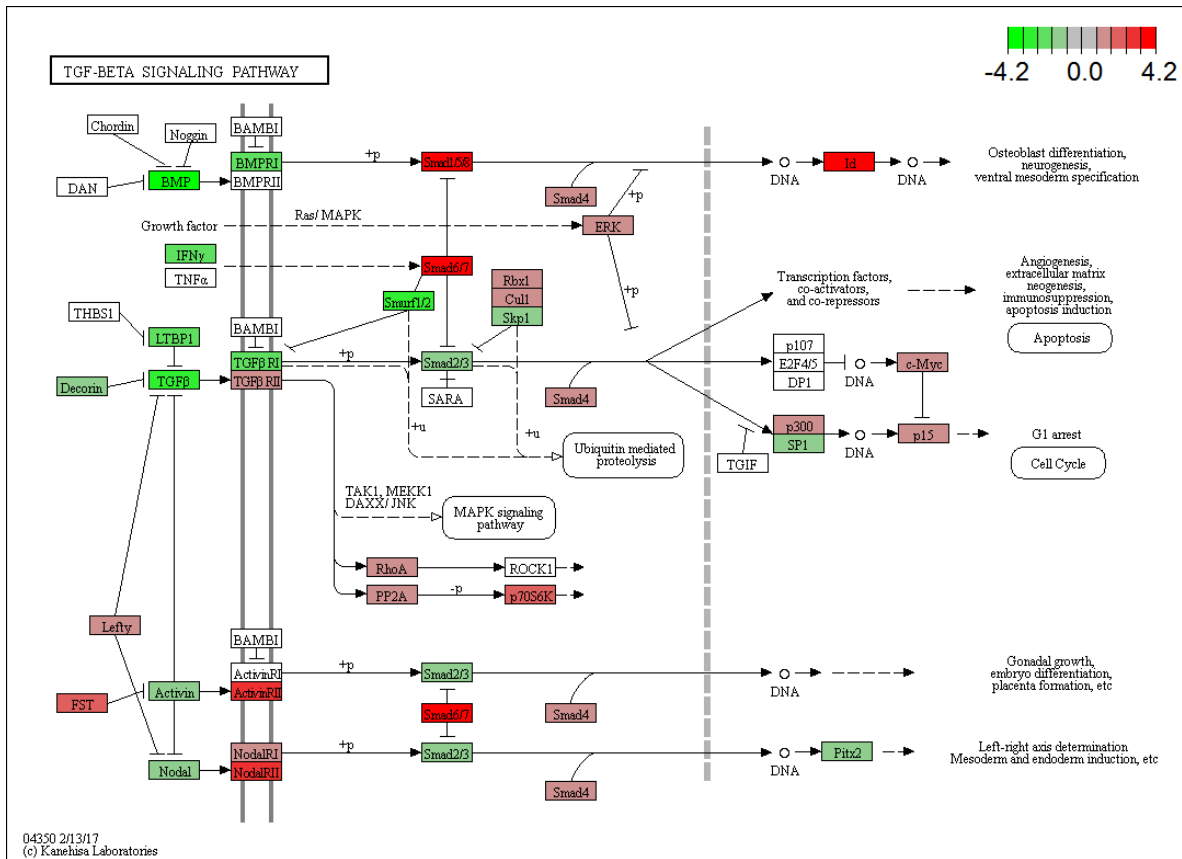

**Figure S3.** KEGG enrichment pathway: TGF- $\beta$  signaling pathway. The down-regulation (green color shaded genes) and up-regulation (red color shaded genes) of most genes in this pathway in Huh-7 shlacZ vs. Huh-7 shHMGC52 cells.

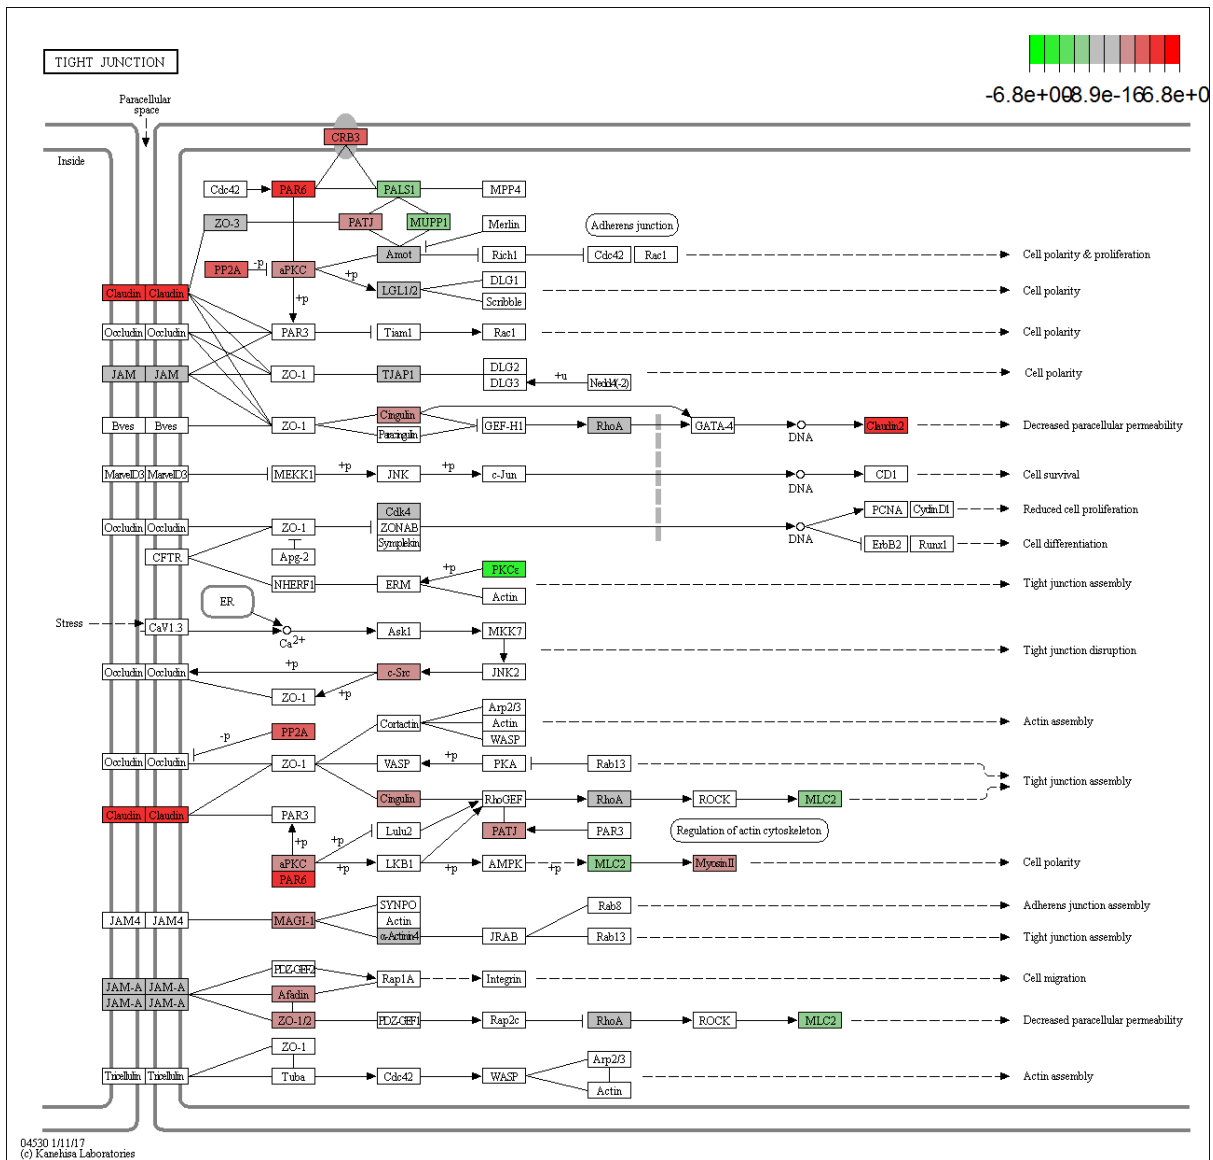

**Figure S4.** KEGG enrichment pathway: tight junction pathway. The down-regulation (green color shaded genes) and up-regulation (red color shaded genes) of most genes in this pathway in Huh-7 shlacZ vs. Huh-7 shHMGCS2 cells.

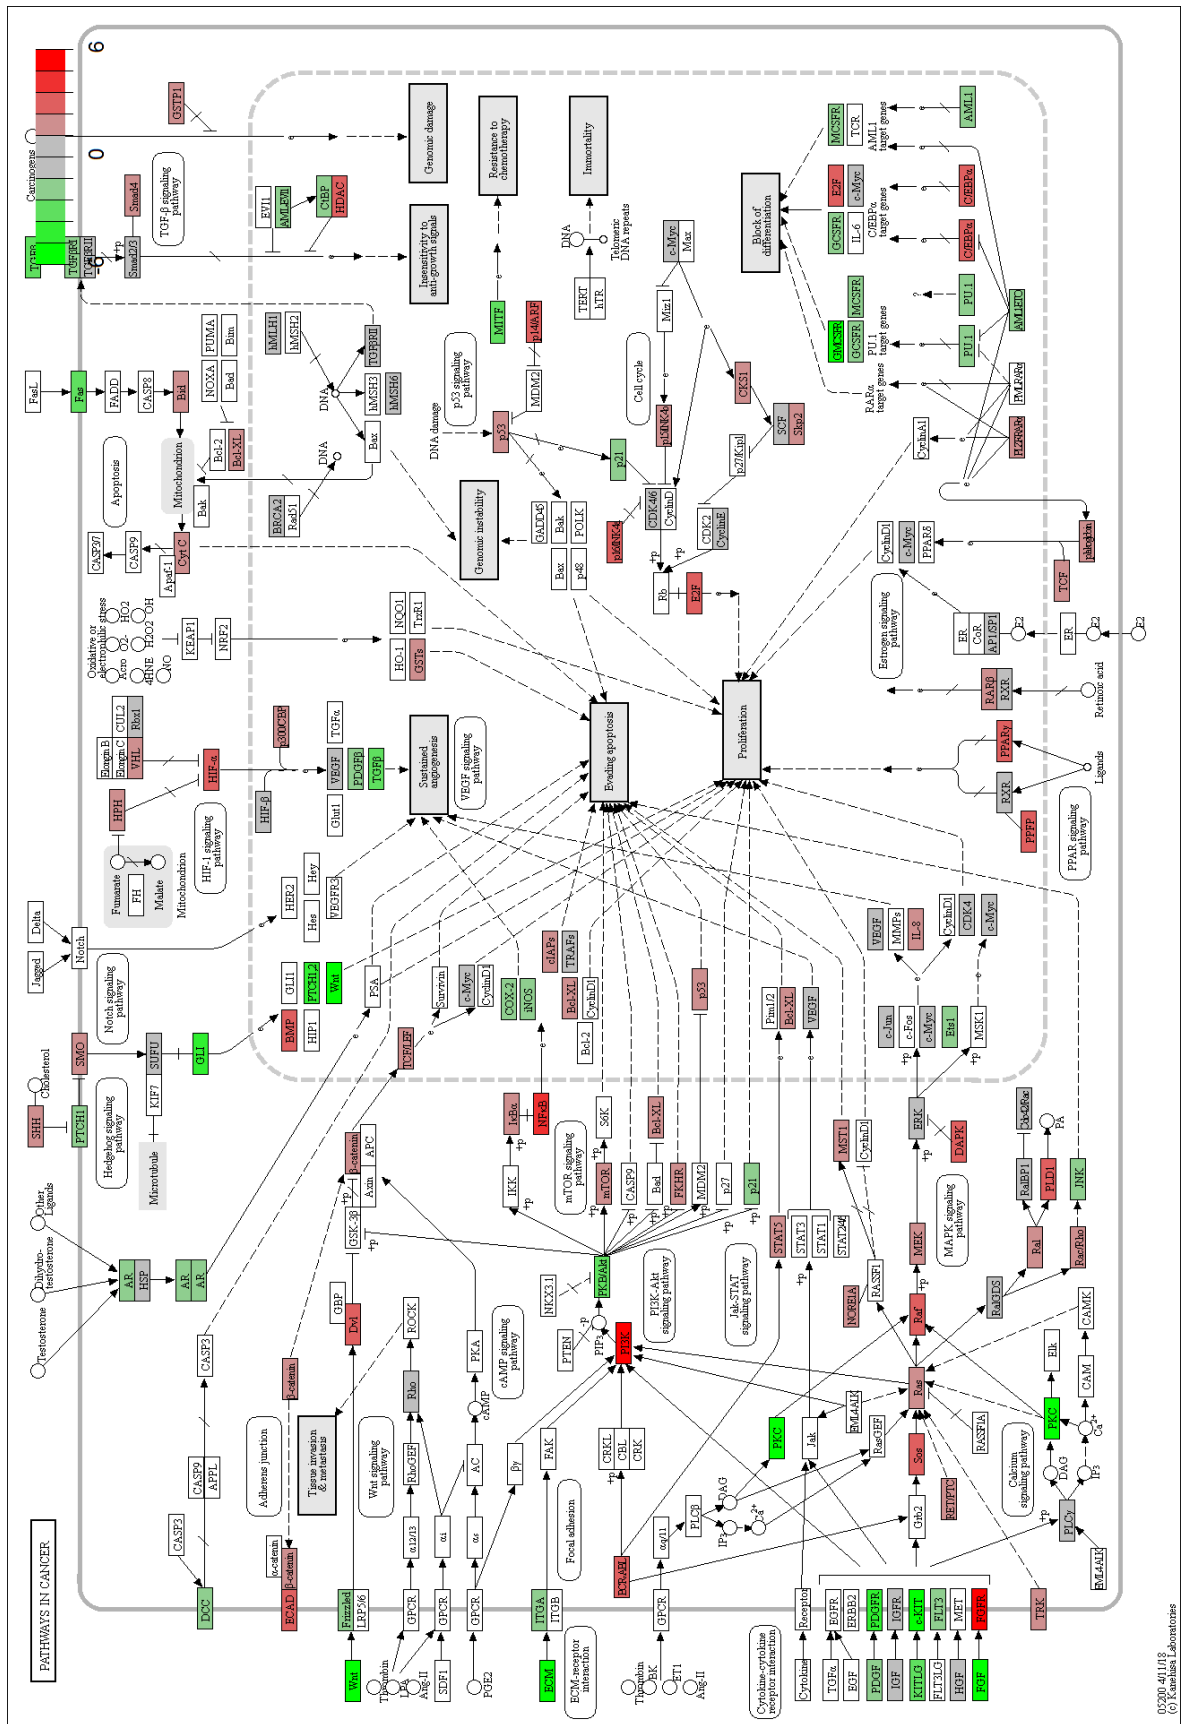

**Figure S5.** KEGG enrichment pathway: pathways in cancer. The down-regulation (green color shaded genes) and up-regulation (red color shaded genes) of most genes in this pathway in Huh-7 shlacZ vs. Huh-7 shHMGS2 cells.

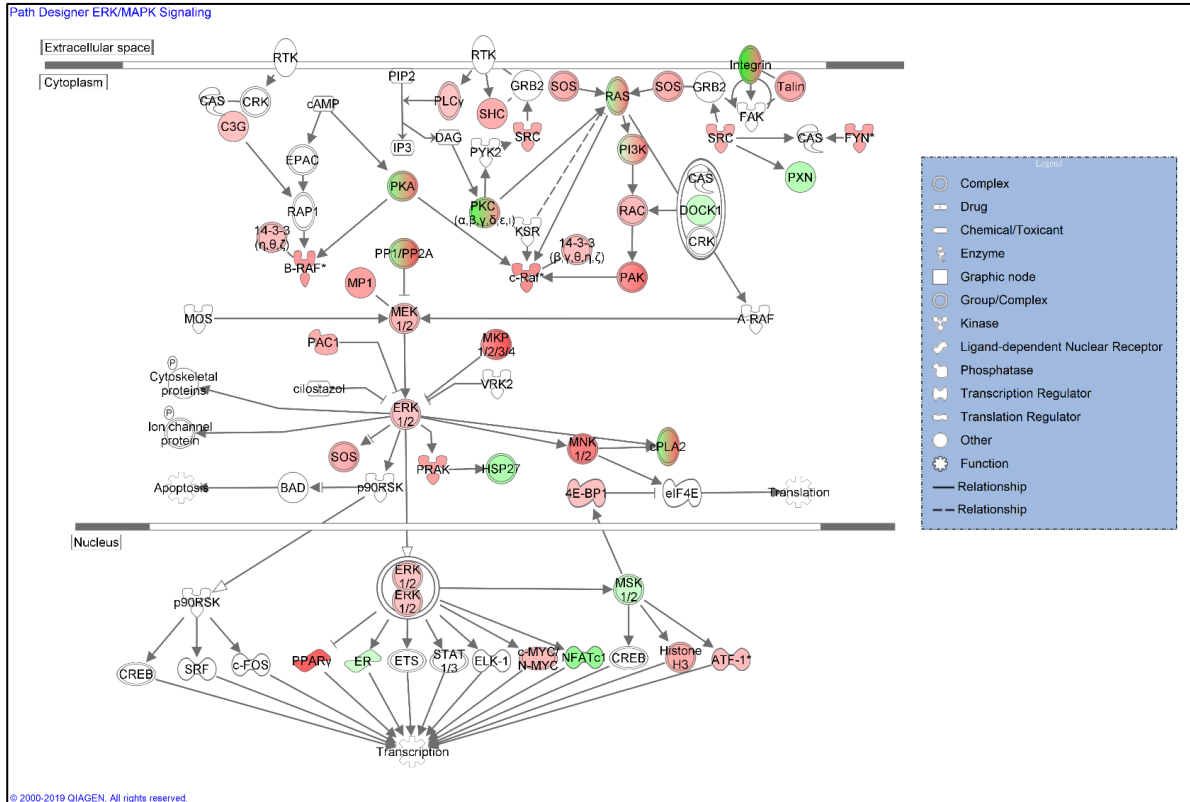

**Figure S6.** IPA enrichment pathway: ERK/MAPK signaling. The down-regulation (green color shaded genes) and up-regulation (red color shaded genes) of most genes in this pathway in Huh-7 shlacZ vs. Huh-7 shHMGCS2 cells.

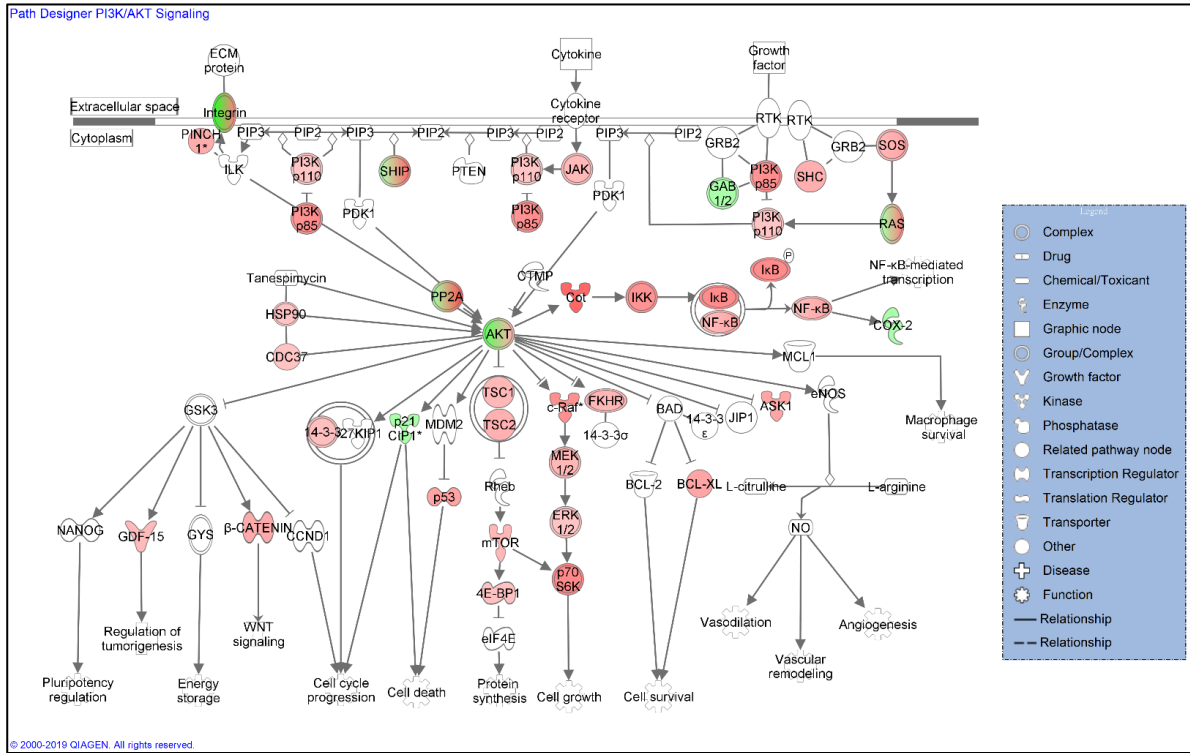

**Figure S7.** IPA enrichment pathway: PI3K/AKT signaling. The down-regulation (green color shaded genes) and up-regulation (red color shaded genes) of most genes in this pathway in Huh-7 shlacZ vs. Huh-7 shHMGCS2 cells.

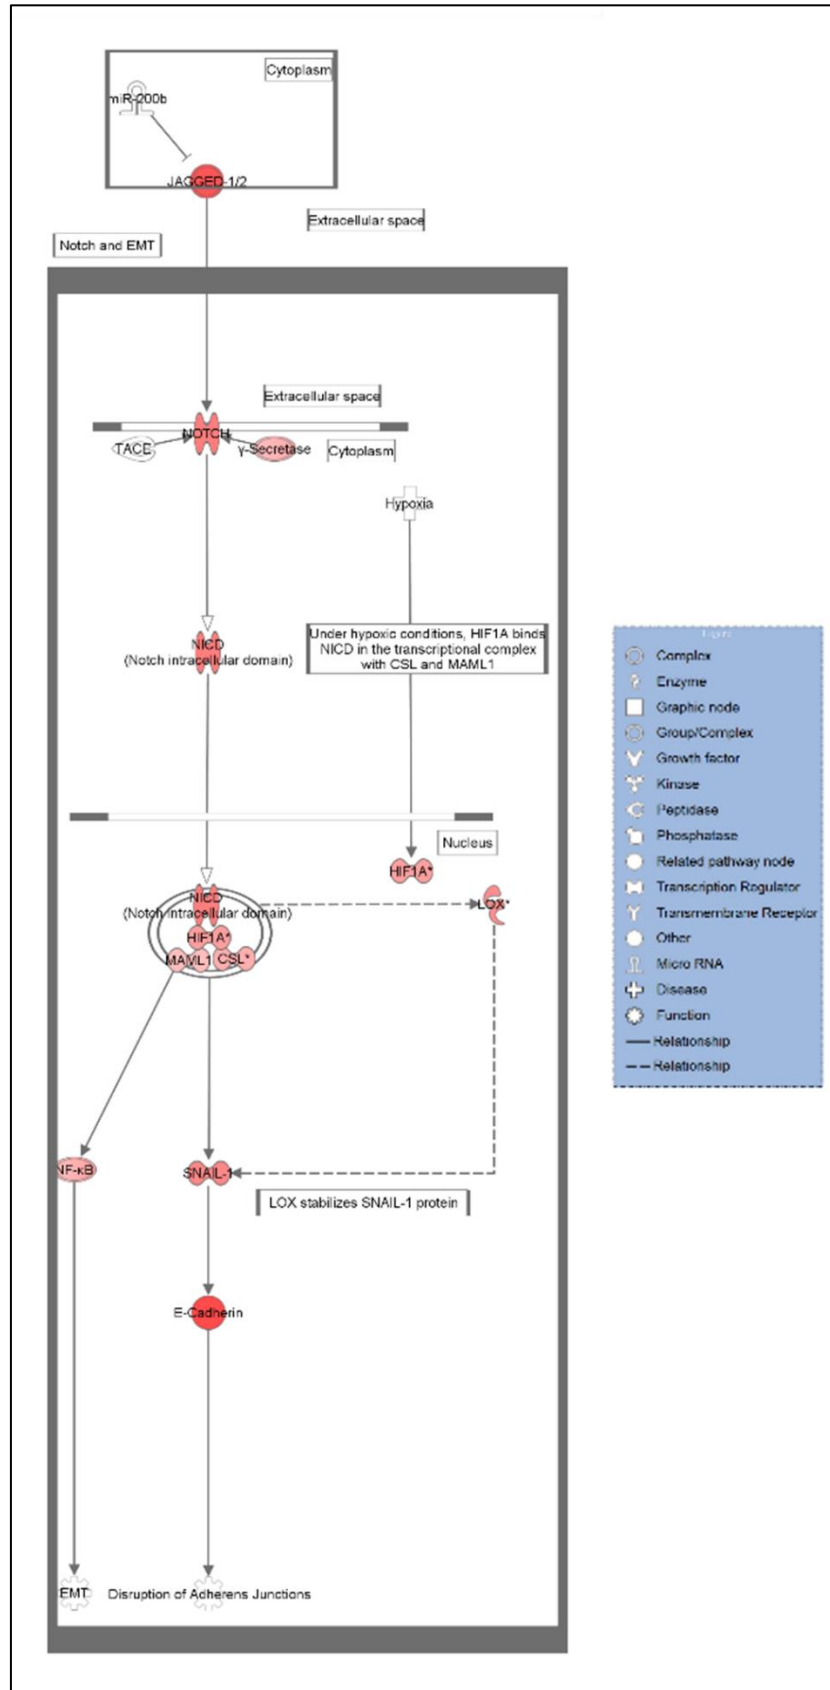

**Figure S8.** IPA enrichment pathway: EMT pathway. The down-regulation (green color shaded genes) and up-regulation (red color shaded genes) of most genes in this pathway in Huh-7 shlacZ vs. Huh-7 shHMGS2 cells.

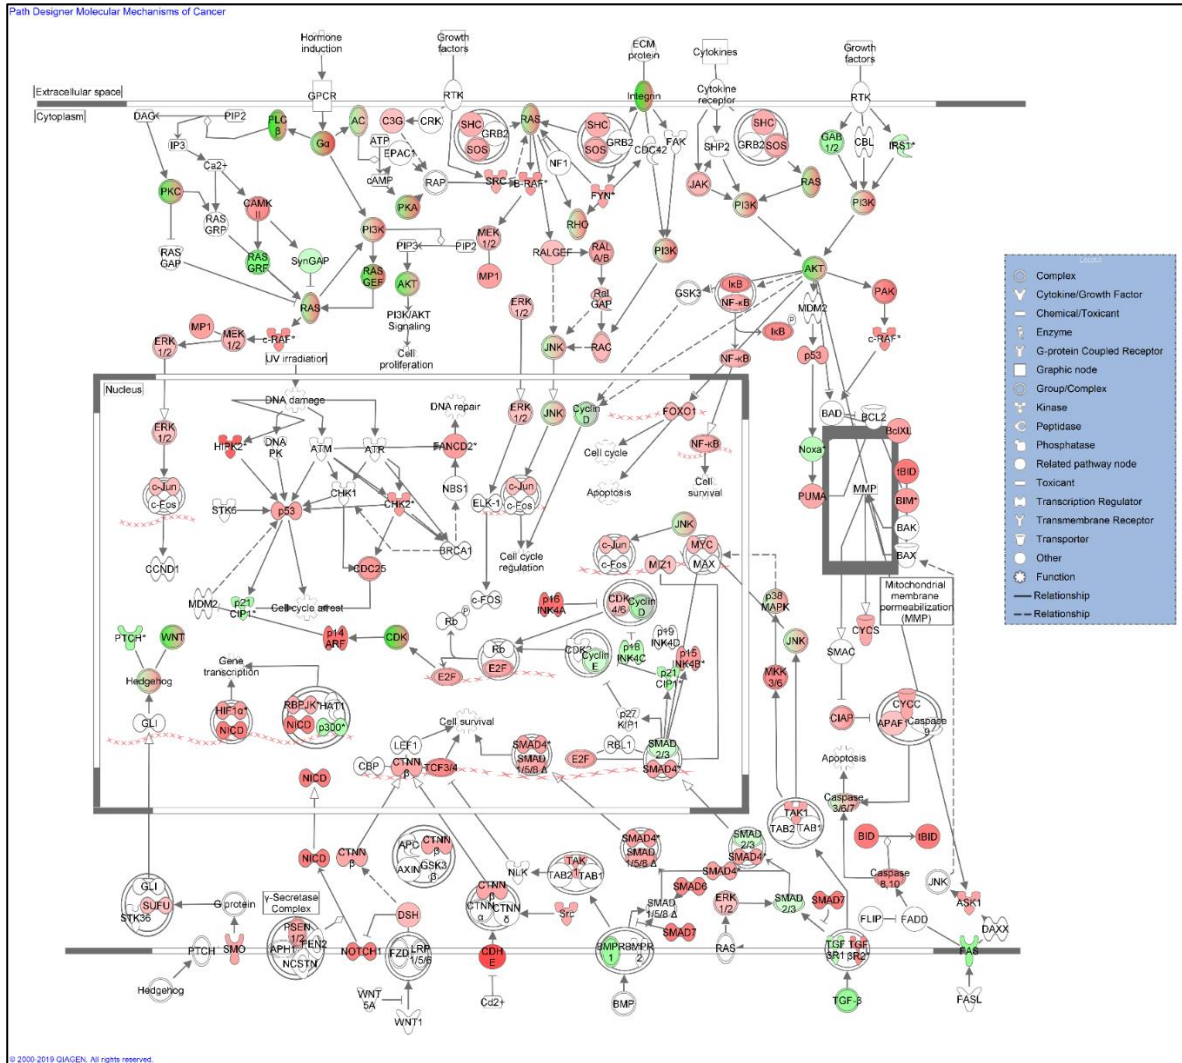

**Figure S9.** IPA enrichment pathway: molecular mechanism of cancer. The down-regulation (green color shaded genes) and up-regulation (red color shaded genes) of most genes in this pathway in Huh-7 shlacZ vs. Huh-7 shHMGCS2 cells.

**B**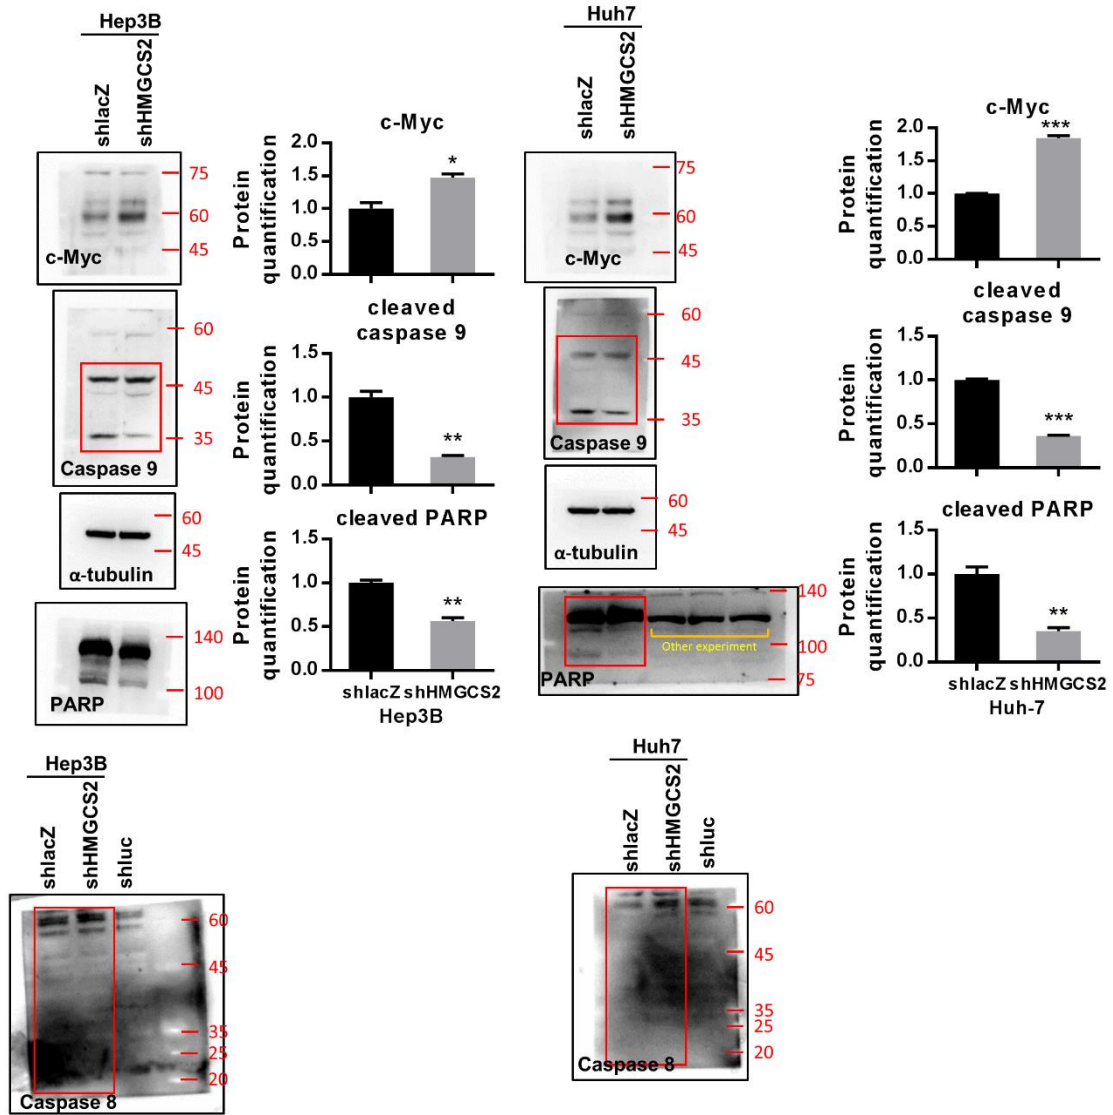

**Figure S10.** Original unedited pictures and protein quantification of Figure 3B. Complete western blot image corresponding to Figure 3B showing all bands and molecular weight markers for c-Myc, caspase9, caspase8, PARP, and  $\alpha$ -tubulin. The quantification of the figure was presented by using ImageJ system. \*  $p < 0.05$ ; \*\*  $p < 0.01$ ; \*\*\*  $p < 0.001$  vs. control group.



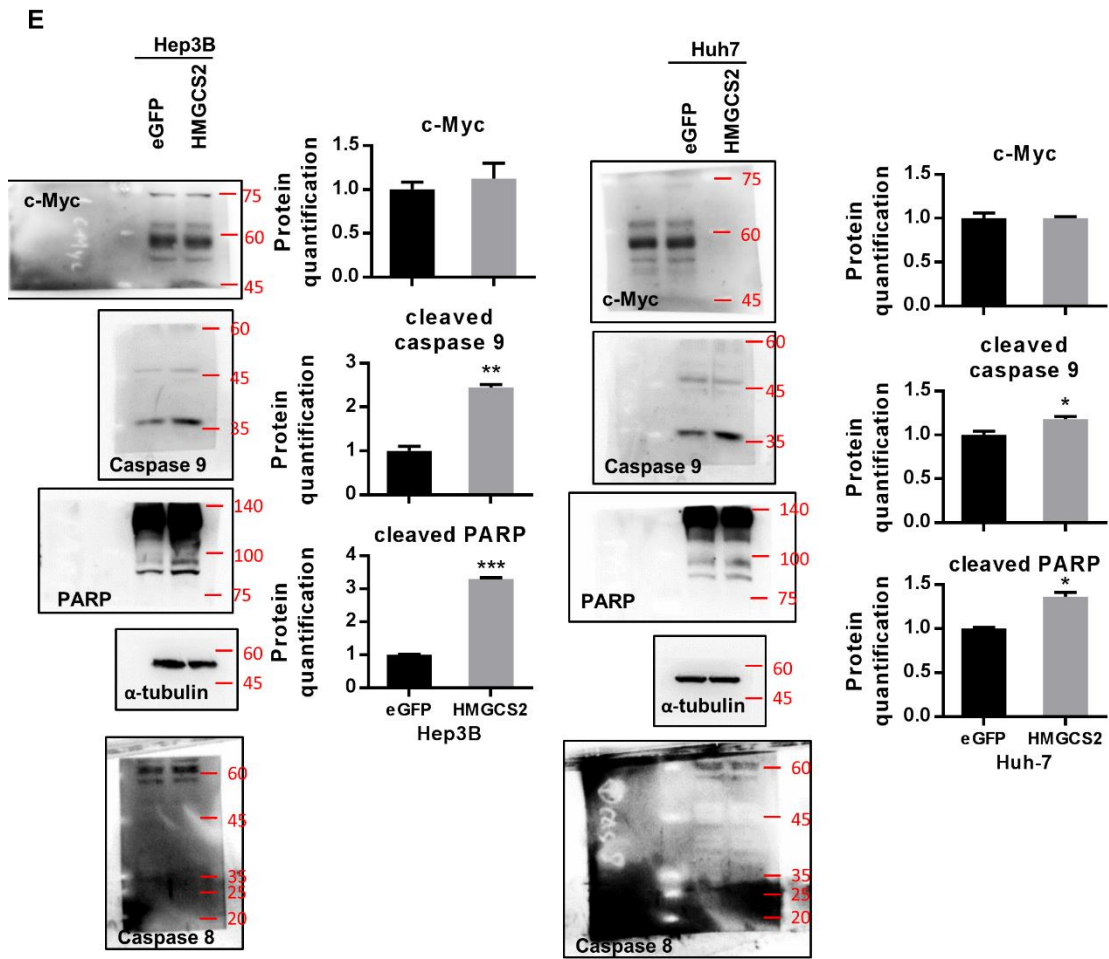

**Figure S11.** Original unedited pictures and protein quantification of Figure 3E. Complete western blot image corresponding to Figure 3E showing all bands and molecular weight markers for c-Myc, caspase9, caspase8, PARP, and  $\alpha$ -tubulin. The quantification of the figure was presented by using ImageJ system. \*  $p < 0.05$ ; \*\*  $p < 0.01$ ; \*\*\*  $p < 0.001$  vs. control group.

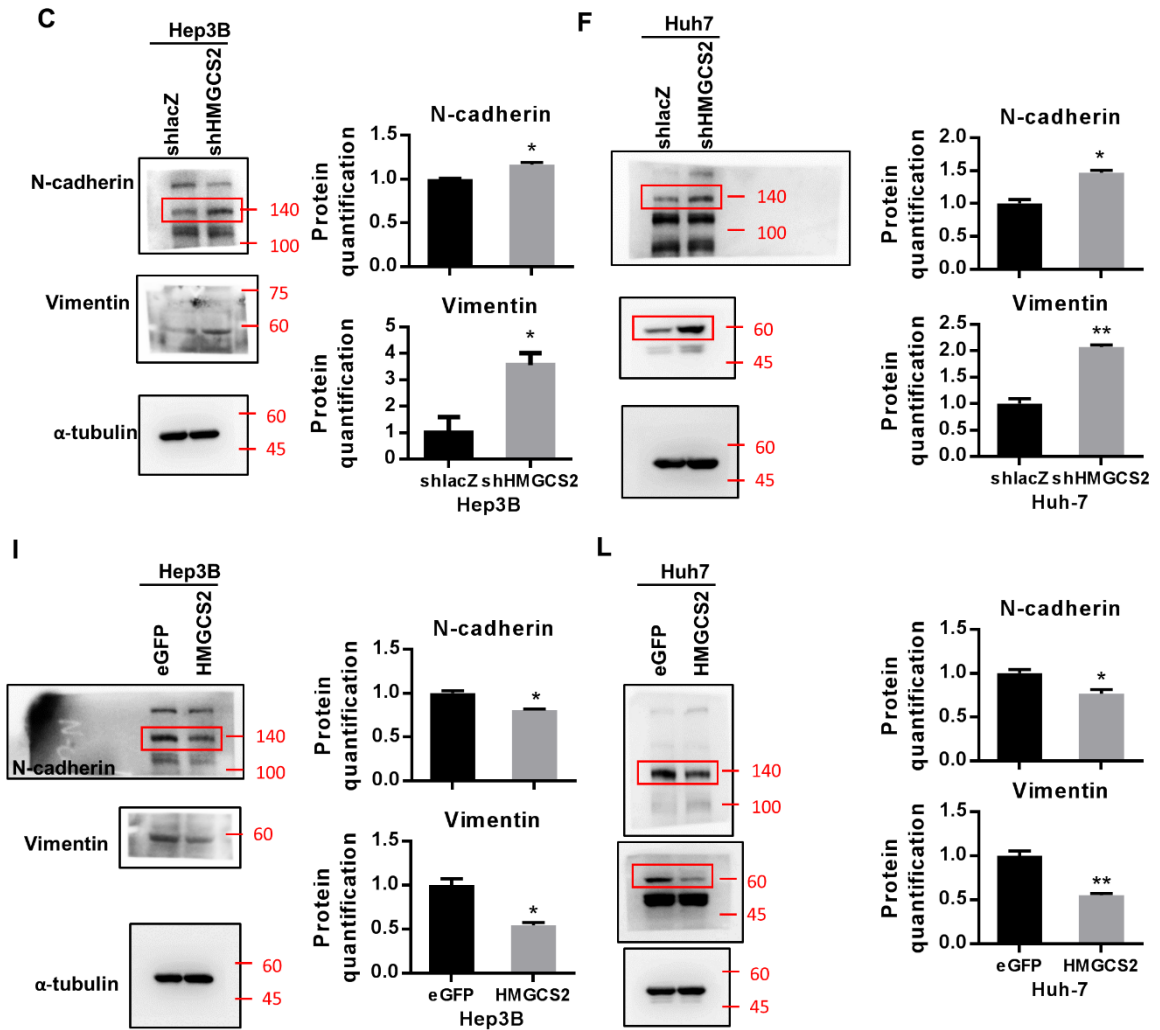

**Figure S12.** Original unedited pictures and protein quantification of Figure 4. Complete western blot image corresponding to Figure 4 showing all bands and molecular weight markers for N-cadherin, Vimentin, and  $\alpha$ -tubulin. The quantification of the figure was presented by using ImageJ system. \*  $p < 0.05$ ; \*\*  $p < 0.01$  vs. control group.

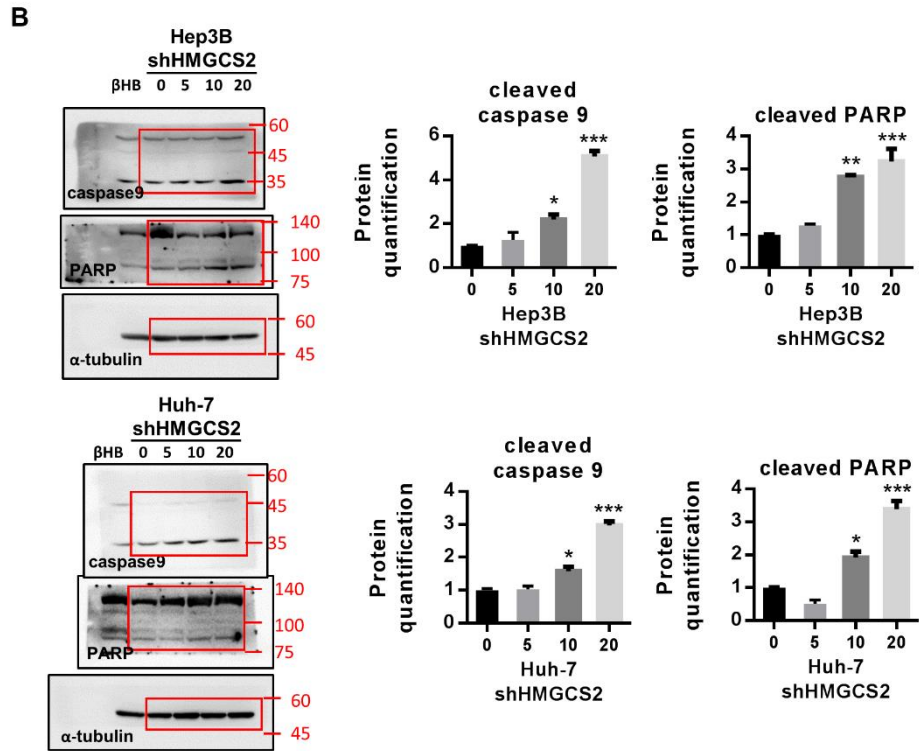

**Figure S13.** Original unedited pictures and protein quantification of Figure 5. Complete western blot image corresponding to Figure 5 showing all bands and molecular weight markers for caspase9, PARP, and  $\alpha$ -tubulin. The quantification of the figure was presented by using ImageJ system.

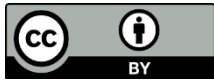

© 2019 by the authors. Submitted for possible open access publication under the terms and conditions of the Creative Commons Attribution (CC BY) license (<http://creativecommons.org/licenses/by/4.0/>).
